# Supplementary material
Source: publisher figshare collection journal article supplement (https://acs.figshare.com/ndownloader/files/5823270)
Supplement: Supplementary file 1 [file 5823270]

**Figure.** Atom numbering used for thiocarbonylthio group in Table.

**Table. Atomic Charges and Geometric Parameters for Thiocarbonylthio Group of from Gaussian 98 Calculations with MP2/D95 Basis Set**

| Compound | Atomic charges1,2 | | | bond length (Å)1 | | bond angle (degrees) | |
| --- | --- | --- | --- | --- | --- | --- | --- |
| (CH3)2NCS(S)CH3 | 1 | S | -0.014062 | R(1,2) | 1.7169 | A(1,2,3) | 123.1469 |
|  | 2 | C | -0.36902 | R(2,3) | 1.8696 | A(1,2,4) | 124.145 |
|  | 3 | S | 0.170142 | R(2,4) | 1.3819 | A(3,2,4) | 112.7081 |
|  | 4 | N | -0.129759 | R(3,5) | 1.8861 |  |  |
|  | 5 | C | -0.002449 |  |  |  |  |
|  |  |  |  |  |  |  |  |
| H2NCS(S)CH3 | 1 | S | 0.03623 | R(1,2) | 1.6998 | A(1,2,3) | 125.6729 |
|  | 2 | C | -0.324758 | R(2,3) | 1.8531 | A(1,2,4) | 123.8117 |
|  | 3 | S | 0.179447 | R(2,4) | 1.3865 | A(3,2,4) | 110.5153 |
|  | 4 | N | 0.109725 | R(3,5) | 1.8862 |  |  |
|  | 5 | C | -0.704548 |  |  |  |  |
|  |  |  |  |  |  |  |  |
|  |  |  |  |  |  |  |  |
| CH3C(S)SCH3 | 1 | S | 0.093251 | R(1,2) | 1.6875 | A(1,2,3) | 125.1862 |
|  | 2 | C | -0.404935 | R(2,3) | 1.8288 | A(1,2,4) | 123.6352 |
|  | 3 | S | 0.231541 | R(2,4) | 1.539 | A(3,2,4) | 111.1549 |
|  | 4 | C | -0.53602 | R(3,5) | 1.888 |  |  |
|  | 5 | C | -0.018494 |  |  |  |  |
|  |  |  |  |  |  |  |  |
| H3SiCS(S)CH3 | 1 | S | 0.11018 | R(1,2) | 1.6999 | A(1,2,3) | 124.9346 |
|  | 2 | C | -0.873849 | R(2,3) | 1.8179 | A(1,2,4) | 120.5151 |
|  | 3 | S | 0.275235 | R(2,4) | 1.9276 | A(3,2,4) | 114.5503 |
|  | 4 | Si | 0.510303 | R(3,5) | 1.8905 |  |  |
|  | 5 | C | -0.021869 |  |  |  |  |
|  |  |  |  |  |  |  |  |
| CH3OCS(S)CH3 | 1 | S | 0.074601 | R(1,2) | 1.6881 | A(1,2,3) | 127.9206 |
|  | 2 | C | -0.309013 | R(2,3) | 1.8303 | A(1,2,4) | 126.1607 |
|  | 3 | S | 0.265461 | R(2,4) | 1.3963 | A(3,2,4) | 105.9187 |
|  | 4 | O | -0.296045 | R(3,5) | 1.89 |  |  |
|  | 5 | C | -0.026241 |  |  |  |  |
|  |  |  |  |  |  |  |  |
|  |  |  |  |  |  |  |  |
| CH3SCS(S)CH3 | 1 | S | 0.113737 | R(1,2) | 1.6886 | A(1,2,3) | 125.6002 |
|  | 2 | C | -0.654308 | R(2,3) | 1.8375 | A(1,2,4) | 125.6002 |
|  | 3 | S | 0.281781 | R(2,4) | 1.8375 | A(3,2,4) | 108.7996 |
|  | 4 | S | 0.281781 | R(3,5) | 1.8901 |  |  |
|  | 5 | C | -0.011495 | R(4,6) | 1.8901 |  |  |
|  |  |  |  |  |  |  |  |
| C6H6CS(S)CH3 | 1 | S | 0.103127 | R(1,2) | 1.6966 | A(1,2,3) | 123.9095 |
|  | 2 | C | -0.01197 | R(2,3) | 1.8438 | A(1,2,4) | 122.1905 |
|  | 3 | S | 0.221797 | R(2,4) | 1.8861 | A(3,2,4) | 113.8999 |
|  | 4 | C | 0.573893 | R(3,5) | 1.5176 |  |  |
|  | 5 | C | -0.012269 | R(4,6) | 1.8861 |  |  |
|  |  |  |  |  |  |  |  |
| pyrollCS(S)CH3 | 1 | S | 0.111409 | R(1,2) | 1.6898 | A(1,2,3) | 124.6281 |
|  | 2 | C | -0.400548 | R(2,3) | 1.8438 | A(1,2,4) | 123.6568 |
|  | 3 | S | 0.224946 | R(2,4) | 1.4274 | A(3,2,4) | 111.7014 |
|  | 4 | N | -0.183543 | R(3,5) | 1.8874 |  |  |
|  | 5 | C | 0.00504 |  |  |  |  |
|  |  |  |  |  |  |  |  |
| lactamCS(S)CH3 | 1 | S | 0.163191 | R(1,2) | 1.6868 | A(1,2,3) | 124.0207 |
|  | 2 | C | -0.408322 | R(2,3) | 1.8673 | A(1,2,4) | 125.2059 |
|  | 3 | S | 0.195201 | R(2,4) | 1.4175 | A(3,2,4) | 110.7689 |
|  | 4 | N | -0.257725 | R(3,5) | 1.8857 |  |  |
|  | 5 | C | -0.003835 | R(4,6) | 1.5098 |  |  |

**1** with hydrogens summed into heavy atoms. 2 For atom numbering refer Figure.

**Gaussian Archive Entries**

### C6H6CS(S)CH3

**RHF/3-21G***

1\1\ NECSYS-FLOREY\FOpt\RHF\3-21G*\C8H8S2\CSMAS\01-Oct-2001\0\\#RHF/3-

21G* OPT\\freq calc\\0,1\C,0.5102446599,-0.0925069615,0.4505074095\C,0

.5123364446,-0.0701356031,1.8415354469\C,1.7248086139,-0.1264679185,-0

.2283224248\C,-0.7885762861,-0.0954476492,-0.2849042761\C,1.7041655714

,-0.0652833773,2.5375602638\C,2.9163060748,-0.1359839126,0.4730423924\

H,-0.4204955917,-0.0520748261,2.3647917888\H,1.7405121621,-0.167949850

6,-1.2978973815\S,-2.1101973165,-0.8752731118,0.2615044398\S,-0.732912

3458,0.8459888421,-1.7546579119\C,2.909012773,-0.0996835571,1.85537652

1\H,1.6930564944,-0.0363345077,3.6085462879\H,3.8446998917,-0.17562391

72,-0.0603791726\C,-2.354156663,0.5821906238,-2.5007834806\H,3.8334778

879,-0.1011907144,2.3976347685\H,-2.3475533641,1.1295217211,-3.4344582

023\H,-3.1366192716,0.9590759713,-1.8604545899\H,-2.5221707432,-0.4669

654285,-2.6913990581\\Version=NEC-SX-SUPER-UX-G98RevA.9\HF=-1097.21807

28\RMSD=5.366e-09\RMSF=9.051e-06\Dipole=0.6402388,0.3747593,-0.3090579

\PG=C01 [X(C8H8S2)]\\@

# RHF/cc-pVDZ

1\1\ NECSYS-FLOREY\FOpt\RHF\CC-pVDZ\C8H8S2\CSMAS\02-Jun-2002\0\\#RHF/C

C-PVDZ DENSITY=CURRENT GEOM=CHECKPOINT OPT\\opt calc\\0,1\C,0.48409986

72,0.,0.5028808956\C,0.4105910163,0.,1.8997922955\C,1.7501939116,0.,-0

.0914688048\C,-0.7745644095,0.,-0.3070565811\C,1.5590111457,0.,2.67141

74411\C,2.8998467208,0.,0.6821254324\H,-0.5564662004,0.,2.3754568958\H

,1.8570751538,0.,-1.1648363483\C,2.8083076007,0.,2.0656237217\H,1.4772

150968,0.,3.7497531188\H,3.8673298948,0.,0.1992067543\H,3.7060781808,0

.,2.6695406183\S,-2.2742969461,0.,0.355645375\S,-0.5159912401,0.,-2.04

79173407\C,-2.1779673254,0.,-2.7571849476\H,-2.0173776274,0.,-3.834845

4781\H,-2.7231773416,0.8903925402,-2.4573504136\H,-2.7231773416,-0.890

3925402,-2.4573504136\\Version=NEC-SX-SUPER-UX-G98RevA.9\State=1-A'\HF

=-1102.6764922\RMSD=9.097e-09\RMSF=2.779e-05\Dipole=0.7591911,0.,-0.31

44205\PG=CS [SG(C8H6S2),X(H2)]\\@

**B3LYP/6-31G(d)**

1\1\ NECSYS-FLOREY\FOpt\RB3LYP\6-31G(d)\C8H8S2\CSMAS\27-May-2002\0\\#B

3LYP/6-31G* GEOM=CHECKPOINT DENSITY=CURRENT OPT\\opt calc\\0,1\C,0.479

3035364,0.,0.4987197842\C,0.4044841591,0.,1.9051773844\C,1.7581237884,

0.,-0.0943263607\C,-0.7735000567,0.,-0.3077389734\C,1.55681519,0.,2.68

37476662\C,2.910301478,0.,0.6869626778\H,-0.573041988,0.,2.3738424851\

H,1.8659415585,0.,-1.173745739\C,2.8160536061,0.,2.0795613781\H,1.4710

704991,0.,3.7668120962\H,3.8837852817,0.,0.2047915708\H,3.7161296612,0

.,2.6883715771\S,-2.2934094732,0.,0.3503398393\S,-0.5004915273,0.,-2.0

594964449\C,-2.1791624269,0.,-2.7522194303\H,-2.043886027,0.,-3.837372

8987\H,-2.726049312,0.8908603378,-2.4377490804\H,-2.726049312,-0.89086

03378,-2.4377490804\\Version=NEC-SX-SUPER-UX-G98RevA.9\State=1-A'\HF=-

1106.0442069\RMSD=8.906e-09\RMSF=3.771e-05\Dipole=0.7432789,0.,-0.3139

065\PG=CS [SG(C8H6S2),X(H2)]\\@

**RHF/D95**

1\1\ NECSYS-FLOREY\FOpt\RHF\D95\C8H8S2\CSMAS\26-May-2002\0\\#RHF/D95 O

PT\\opt calc\\0,1\C,0.4895632769,0.,0.5087193062\C,0.4139725643,0.,1.9

121676743\C,1.7623339401,0.,-0.0878295078\C,-0.7605665651,0.,-0.295858

9185\C,1.5662963713,0.,2.6895075328\C,2.9152962945,0.,0.6908206754\H,-

0.5449120259,0.,2.3847952392\H,1.8666203931,0.,-1.1521619548\C,2.82256

00926,0.,2.0820353775\H,1.4851352715,0.,3.7581928002\H,3.8756996797,0.

,0.215166224\H,3.7115691015,0.,2.6814513933\S,-2.2979242245,0.,0.37242

05471\S,-0.5019385152,0.,-2.0777574916\C,-2.2159271314,0.,-2.795435087

9\H,-2.0653300059,0.,-3.8636957837\H,-2.7460758185,0.8820235767,-2.481

5595593\H,-2.7460758185,-0.8820235767,-2.4815595593\\Version=NEC-SX-SU

PER-UX-G98RevA.9\State=1-A'\HF=-1102.4542805\RMSD=4.015e-09\RMSF=2.815

e-05\Dipole=0.7950534,0.,-0.2610409\PG=CS [SG(C8H6S2),X(H2)]\\@

# MP2/D95

1\1\ NECSYS-FLOREY\FOpt\RMP2-FC\D95\C8H8S2\CSMAS\30-May-2002\0\\#MP2=D

IRECT/D95 DENSITY=CURRENT GEOM=CHECKPOINT GUESS=CHECK OPT=READFC\\opt calc\\0,1\C,0.4909171629,0.,0.5180974921\C,0.4057286171,0.,1.949790462

4\C,1.7913303042,0.,-0.0878860437\C,-0.7810870537,0.,-0.3095368197\C,1

.5814959102,0.,2.7455675493\C,2.9643105896,0.,0.7155929748\H,-0.577879

0699,0.,2.4256725304\H,1.9004907282,0.,-1.1751575744\C,2.8700006435,0.

,2.1358721346\H,1.4922900936,0.,3.8365707741\H,3.9461004108,0.,0.23164

96346\H,3.7748818101,0.,2.7513855148\S,-2.3423950104,0.,0.3544941939\S

,-0.4878855345,0.,-2.1298277255\C,-2.249038376,0.,-2.8048795243\H,-2.1

257380441,0.,-3.8992609173\H,-2.7838019986,0.9000475104,-2.4706164045\

H,-2.7838019986,-0.9000475104,-2.4706164045\\Version=NEC-SX-SUPER-UX-G

98RevA.9\State=1-A'\HF=-1102.4440352\MP2=-1103.248061\RMSD=5.259e-09\R

MSF=6.510e-05\Dipole=-0.4022422,0.1434328,0.\PG=CS [SG(C8H6S2),X(H2)]\

\@

# QCISD/D95//MP2/D95

QCISD=-1103.318116

# H3SiCS(S)CH3

# RHF/3-21G*

1\1\ NECSYS-FLOREY\FOpt\RHF\3-21G*\C2H6S2Si1\CSMAS\01-Oct-2001\0\\#RHF

/3-21G* OPT\\freq calc\\0,1\S,-0.3150733732,0.,-1.6972580417\C,-0.2839

29684,0.,-0.0686338351\S,1.1154459512,0.,0.9385606835\Si,-1.9549364915

,0.,0.8531620945\C,2.5019337065,0.,-0.2195444588\H,3.4042079172,0.,0.3

771439448\H,-1.7169272659,0.,2.3070270639\H,2.4739119762,0.8805681024,

-0.8440096346\H,2.4739119762,-0.8805681024,-0.8440096346\H,-2.68998955

27,-1.2104333885,0.4639032166\H,-2.6899895527,1.2104333885,0.463903216

6\\Version=NEC-SX-SUPER-UX-G98RevA.9\State=1-A'\HF=-1157.5957269\RMSD=

7.270e-09\RMSF=4.280e-05\Dipole=0.4709828,0.,0.5475787\PG=CS [SG(C2H2S

2Si1),X(H4)]\\@

**B3LYP/6-31G(d)**

1\1\ NECSYS-FLOREY\FOpt\RB3LYP\6-31G(d)\C2H6S2Si1\CSMAS\27-May-2002\0\

\#B3LYP/6-31G* GEOM=CHECKPOINT DENSITY=CURRENT OPT\\opt calc\\0,1\S,-0

.3108644858,0.,-1.7252314497\C,-0.2940560484,0.,-0.0747693214\S,1.1141

632355,0.,0.9527322028\Si,-1.9571130704,0.,0.8636044199\C,2.513668438,

0.,-0.2128717444\H,3.4214029445,0.,0.3952115831\H,-1.7264022615,0.,2.3

339866233\H,2.4785607953,0.8905267455,-0.8444968327\H,2.4785607953,-0.

8905267455,-0.8444968327\H,-2.711496811,-1.2165354688,0.4775839624\H,-

2.711496811,1.2165354688,0.4775839624\\Version=NEC-SX-SUPER-UX-G98RevA

.9\State=1-A'\HF=-1165.6819576\RMSD=2.092e-09\RMSF=5.652e-05\Dipole=0.

6200152,0.,0.5115472\PG=CS [SG(C2H2S2Si1),X(H4)]\\@

# RHF/cc-pVDZ

1\1\ NECSYS-FLOREY\FOpt\RHF\CC-pVDZ\C2H6S2Si1\CSMAS\02-Jun-2002\0\\#RH

F/CC-PVDZ DENSITY=CURRENT GEOM=CHECKPOINT OPT\\opt calc\\0,1\S,-0.0676

529423,-1.7047368711,0.3149766737\C,-0.0597539907,-0.0720050785,0.2782

00956\S,0.2370196803,0.9334989957,-1.1035095874\Si,-0.4136608067,0.867

2008555,1.9259103955\C,0.5293638032,-0.2237010067,-2.4645971652\H,0.71

7493795,0.395348007,-3.3404875107\H,-0.3641029117,2.3338250486,1.69518

01362\H,-0.3468151579,-0.8471768584,-2.6242643431\H,1.3938296102,-0.84

71768584,-2.2503962126\H,0.6251204112,0.4692056007,2.9024031729\H,-1.7

618011344,0.4692056007,2.3897230947\\Version=NEC-SX-SUPER-UX-G98RevA.9

\State=1-A'\HF=-1163.2016323\RMSD=2.869e-09\RMSF=7.302e-06\Dipole=0.10

39331,0.5423428,-0.483889\PG=CS [SG(C2H2S2Si1),X(H4)]\\@

# RHF/D95

1\1\ NECSYS-FLOREY\FOpt\RHF\D95\C2H6S2Si1\CSMAS\26-May-2002\0\\#RHF/D9

5 OPT GEOM=CHECKPOINT\\opt calc\\0,1\S,-0.3144180274,0.,-1.7397908728\

C,-0.3129481712,0.,-0.074639026\S,1.128159418,0.,0.9582264863\Si,-1.98

77501454,0.,0.8788306655\C,2.5632678114,0.,-0.2274796363\H,3.447187356

3,0.,0.3900037318\H,-1.7316422544,0.,2.3366842821\H,2.5257726338,0.882

1178795,-0.8437420562\H,2.5257726338,-0.8821178795,-0.8437420562\H,-2.

7301842128,-1.2164432908,0.4874544699\H,-2.7301842128,1.2164432908,0.4

874544699\\Version=NEC-SX-SUPER-UX-G98RevA.9\State=1-A'\HF=-1163.00006

88\RMSD=4.680e-09\RMSF=2.919e-05\Dipole=0.400506,0.,0.5294871\PG=CS [S

G(C2H2S2Si1),X(H4)]\\@

# MP2/D95

1\1\ NECSYS-FLOREY\FOpt\RMP2-FC\D95\C2H6S2Si1\CSMAS\30-May-2002\0\\#MP

2=DIRECT/D95 OPT=READFC GUESS=CHECK DENSITY=CURRENT GEOM=CHECKPOINT\\o

pt calc\\0,1\S,-0.0601101563,-1.7698470944,0.2798591816\C,-0.068843202

2,-0.0704132876,0.3205182523\S,0.2386868126,1.0067608505,-1.1112713753

\Si,-0.422485444,0.8674164226,1.9669958944\C,0.5372175788,-0.239503372

,-2.5011625534\H,0.7299802818,0.3671039031,-3.3986217458\H,-0.36903374

44,2.341891604,1.7181369687\H,-0.3537792291,-0.8694913277,-2.636043699

\H,1.4050164258,-0.8694913277,-2.2582769913\H,0.6143615926,0.477518545

7,2.9687174125\H,-1.7792218712,0.4775185457,2.4546064399\\Version=NEC-

SX-SUPER-UX-G98RevA.9\State=1-A'\HF=-1162.9965922\MP2=-1163.3627945\RM

SD=7.155e-10\RMSF=2.799e-05\Dipole=0.4018451,0.,0.2407296\PG=CS [SG(C2

H2S2Si1),X(H4)]\\@

# QCISD/D95/MP2/D95

QCISD=-1163.4112803\

**pyrollCS(S)CH3**

# RHF/3-21G*

1\1\ NECSYS-FLOREY\FOpt\RHF\3-21G*\C6H7N1S2\CSMAS\28-Sep-2001\0\\#RHF/

3-21G* OPT\\freq calc\\0,1\S,0.3218255628,-0.0000390724,-2.0705552792\

C,0.3228063378,0.0000015418,-0.428668098\S,1.7923401863,-0.0000111706,

0.5415782701\N,-0.8245073448,0.0000027141,0.3295274758\C,3.1095612777,

0.0000639911,-0.69273844\C,-0.9301720821,0.0000104376,1.7375227492\C,-

2.1335990638,-0.0000061327,-0.18891249\H,4.0323960919,-0.000058025,-0.

1267310783\H,3.0568260602,-0.8815640845,-1.3111466319\H,3.0569282465,0

.8818483871,-1.3109315648\C,-2.2304005772,0.0000152234,2.0651114051\C,

-2.9981645794,0.000004441,0.836284925\H,-0.0683020571,0.0000129061,2.3

588029188\H,-2.2876517147,-0.000016499,-1.2390005605\H,-2.6247329912,0

.0000224731,3.0550898011\H,-4.0607520862,0.0000027187,0.7592566235\\Ve

rsion=NEC-SX-SUPER-UX-G98RevA.9\HF=-1075.4481349\RMSD=3.998e-09\RMSF=6

.829e-05\Dipole=0.3577035,0.000039,0.7584589\PG=C01 [X(C6H7N1S2)]\\@

# RHF/cc-pVDZ

1\1\ NECSYS-FLOREY\FOpt\RHF\CC-pVDZ\C6H7N1S2\CSMAS\01-Jun-2002\0\\#RHF

/CC-PVDZ DENSITY=CURRENT GEOM=CHECKPOINT OPT\\opt calc\\0,1\S,0.300146

6917,-0.060061568,-2.0752857625\C,0.3139300556,-0.0084859249,-0.428888

2209\S,1.7959593847,0.0448396578,0.5310028544\N,-0.8253206519,-0.00250

39023,0.3357327959\C,3.1132474603,0.0270465288,-0.7082431104\C,-0.9169

306172,0.0397234864,1.7307451363\C,-2.1254605611,-0.0392898498,-0.1707

631577\H,4.0317760815,0.0599375159,-0.1231501466\H,3.0725267691,-0.884

0531358,-1.2970016657\H,3.0442060403,0.8978495251,-1.3527091018\C,-2.2

15291374,0.0301474339,2.076874792\C,-2.989610513,-0.0202685071,0.85841

45221\H,-0.0419754974,0.0731410866,2.3516110058\H,-2.288681877,-0.0752

775392,-1.2301693328\H,-2.5939967955,0.0559435567,3.0853032306\H,-4.06

36140831,-0.0397021341,0.7756731999\\Version=NEC-SX-SUPER-UX-G98RevA.9

\HF=-1080.7841114\RMSD=4.817e-09\RMSF=1.839e-05\Dipole=0.3729042,0.029

5135,0.7559659\PG=C01 [X(C6H7N1S2)]\\@

**B3LYP/6-31G(d)**

1\1\ NECSYS-FLOREY\FOpt\RB3LYP\6-31G(d)\C6H7N1S2\CSMAS\26-May-2002\0\\

#B3LYP/6-31G* GEOM=CHECKPOINT DENSITY=CURRENT OPT\\opt calc\\0,1\S,0.3

253901507,0.0000203589,-2.0900551202\C,0.3266049211,-0.0000143453,-0.4

359049512\S,1.8037931906,-0.0000344351,0.5580166463\N,-0.8344730618,-0

.0000127071,0.3327966372\C,3.1194843922,0.0000277985,-0.695340757\C,-0

.9320381121,-0.0000978969,1.7342010895\C,-2.1352949556,0.0000931079,-0

.1897730674\H,4.0525416731,0.0005055746,-0.1246128309\H,3.0581809365,-

0.892623095,-1.3196603174\H,3.0575778366,0.8922750494,-1.320174998\C,-

2.2521381801,-0.0000551536,2.0706180446\C,-3.0142278127,0.000071241,0.

8505077539\H,-0.0522644613,-0.0001990864,2.3570960041\H,-2.2804484596,

0.0001773054,-1.2570085805\H,-2.6434339691,-0.0001079173,3.0789899844\

H,-4.0921171003,0.0001378287,0.762561185\\Version=NEC-SX-SUPER-UX-G98R

evA.9\HF=-1083.9613194\RMSD=5.189e-09\RMSF=4.033e-06\Dipole=0.3646597,

0.0000107,0.6481603\PG=C01 [X(C6H7N1S2)]\\@

# RHF/D95

1\1\ NECSYS-FLOREY\FOpt\RHF\D95\C6H7N1S2\CSMAS\30-May-2002\0\\#RHF/D95

DENSITY=CURRENT OPT\\opt calc\\0,1\S,0.2964336883,0.,-2.1088097202\C,

0.3047867836,0.,-0.4239350695\S,1.821278076,0.,0.5527029273\N,-0.83542

3693,0.,0.3411757641\C,3.1691359603,0.,-0.7298185259\C,-0.9329176025,0

.,1.7527947274\C,-2.1506757247,0.,-0.1711414379\H,4.0844091115,0.,-0.1

587133352\H,3.0932503687,-0.8828506819,-1.3389069425\H,3.0932503687,0.

8828506819,-1.3389069425\C,-2.2411585115,0.,2.0921263935\C,-3.01758938

11,0.,0.8660915304\H,-0.0694936586,0.,2.3728714518\H,-2.3198676176,0.,

-1.2200545263\H,-2.6250143784,0.,3.0874942371\H,-4.0814457163,0.,0.788

9886884\\Version=NEC-SX-SUPER-UX-G98RevA.9\State=1-A'\HF=-1080.5611678

\RMSD=4.247e-09\RMSF=4.543e-05\Dipole=0.3596264,0.,0.7647893\PG=CS [SG

(C6H5N1S2),X(H2)]\\@

**MP2/D95**

1\1\ NECSYS-FLOREY\FOpt\RMP2-FC\D95\C6H7N1S2\CSMAS\31-May-2002\0\\#MP2

=DIRECT/D95 DENSITY=CURRENT OPT\\opt calc\\0,1\S,0.330522585,0.2825927

281,-2.1263711601\C,0.3275701912,0.0221666795,-0.4567888273\S,1.831493

077,-0.3234007439,0.5523766938\N,-0.8563448198,0.0147335291,0.34064041

71\C,3.1891390525,-0.0178563601,-0.722690877\C,-0.9377902063,0.1737290

089,1.7608342787\C,-2.1782243461,-0.1421615421,-0.1772587182\H,4.12860

71258,-0.1472887708,-0.1633023782\H,3.1123202969,-0.7497286345,-1.5372

574255\H,3.1094593987,1.0033394863,-1.1201979364\C,-2.2879524235,0.114

4603318,2.1203844752\C,-3.0689956728,-0.0915121351,0.8992101346\H,-0.0

520981481,0.3554069698,2.359605696\H,-2.337652636,-0.2873166934,-1.239

6378973\H,-2.6719610048,0.2206573349,3.1326321151\H,-4.1489914552,-0.1

982320407,0.8254435716\\Version=NEC-SX-SUPER-UX-G98RevA.9\HF=-1080.549

0683\MP2=-1081.3002247\RMSD=3.577e-09\RMSF=1.960e-05\Dipole=0.3201493,

-0.4461574,0.0536043\PG=C01 [X(C6H7N1S2)]\\@

**QCISD/D95// MP2/D95**

QCISD=-1081.3604749

### CH3C(S)SCH3

# RHF/3-21G*

1\1\ NECSYS-FLOREY\FOpt\RHF\3-21G*\C3H6O1S2\CSMAS\01-Oct-2001\0\\#RHF/

3-21G* OPT\\freq calc\\0,1\S,-0.0910512677,0.,-1.6135611006\C,-0.25836

35553,0.,0.0100261677\S,1.002480039,0.,1.2163024677\O,-1.4181793291,0.

,0.6768343655\C,2.5091860222,0.,0.2218534835\C,-2.69915178,0.,-0.01524

30209\H,3.330945551,0.,0.9263923437\H,-3.4311594646,0.,0.7730130054\H,

2.5629537166,0.8811490731,-0.3985426859\H,2.5629537166,-0.8811490731,-

0.3985426859\H,-2.7865716746,-0.8816427668,-0.6303382789\H,-2.78657167

46,0.8816427668,-0.6303382789\\Version=NEC-SX-SUPER-UX-G98RevA.9\State

=1-A'\HF=-982.2142471\RMSD=7.188e-09\RMSF=1.244e-05\Dipole=-0.1856908,

0.,0.2350698\PG=CS [SG(C3H2O1S2),X(H4)]\\@

**RHF/cc-PVDZ**

1\1\ NECSYS-FLOREY\FOpt\RHF\CC-pVDZ\C3H6S2\CSMAS\02-Jun-2002\0\\#RHF/C

C-PVDZ DENSITY=CURRENT GEOM=CHECKPOINT OPT\\opt calc\\0,1\S,-0.6604828

084,0.0716985471,-1.5609538095\C,-0.6527916645,-0.0028482316,0.0664046

293\S,0.7733389989,-0.0683395256,1.0786852306\C,-1.9165767355,-0.00336

50757,0.8937891469\C,2.1593928511,-0.0074613099,-0.0816726616\H,-2.782

7152761,-0.1278474094,0.2507402996\H,-1.887868667,-0.8008488682,1.6383

814482\H,-1.9954683879,0.9475005429,1.4257621189\H,3.0552530501,-0.047

3517042,0.5365583093\H,2.1282170907,-0.8603726616,-0.7542383139\H,2.13

67364354,0.9172234599,-0.6520332873\\Version=NEC-SX-SUPER-UX-G98RevA.9

\HF=-912.1531636\RMSD=6.393e-09\RMSF=4.538e-06\Dipole=0.311813,-0.0081

16,0.7030747\PG=C01 [X(C3H6S2)]\\@

**B3LYP/6-31G(d)**

1\1\ NECSYS-FLOREY\FOpt\RB3LYP\6-31G(d)\C3H6S2\CSMAS\26-May-2002\0\\#B 3LYP/6-31G* GEOM=CHECKPOINT DENSITY=CURRENT OPT\\opt calc\\0,1\S,-0.65 15823132,0.,-1.5757395341\C,-0.656035296,0.,0.0686073839\S,0.773474770 7,0.,1.0945081362\C,-1.9220551616,0.,0.9000277618\C,2.1553342877,0.,-0 .0891249159\H,-2.7972717513,0.,0.2485768896\H,-1.9582874743,-0.8837184 934,1.5495689013\H,-1.9582874743,0.8837184934,1.5495689013\H,3.0680222 407,0.,0.5127753295\H,2.116041079,-0.8911771393,-0.7189245167\H,2.1160 41079,0.8911771393,-0.7189245167\\Version=NEC-SX-SUPER-UX-G98RevA.9\St ate=1-A'\HF=-914.3071569\RMSD=6.974e-09\RMSF=1.535e-04\Dipole=0.351158 6,0.,0.6840939\PG=CS [SG(C3H2S2),X(H4)]\\@

# RHF/D95

1\1\ NECSYS-FLOREY\FOpt\RHF\D95\C3H6S2\CSMAS\27-May-2002\0\\#RHF/D95 D

ENSITY=CURRENT OPT\\opt/freq calc\\0,1\S,-0.6739731621,-0.0004067114,-

1.5902748911\C,-0.6739591796,-0.0000573037,0.0716244049\S,0.7834334738

,-0.0000728582,1.106937688\C,-1.9389094472,0.0003490118,0.8997809559\C

,2.2065737736,0.0004420023,-0.090570335\H,-2.8062609439,-0.0013887992,

0.2597198736\H,-1.9656172196,-0.873613527,1.5410944616\H,-1.9668814689

,0.876680539,1.5377997047\H,3.094145695,0.00024111,0.521729153\H,2.165

5410319,-0.8813841826,-0.7063167901\H,2.1654770381,0.8827357119,-0.705

641309\\Version=NEC-SX-SUPER-UX-G98RevA.9\HF=-911.9945621\RMSD=2.327e-

09\RMSF=3.845e-06\Dipole=0.3090597,0.0007081,0.6722352\PG=C01 [X(C3H6S

2)]\\@

# MP2/D95

1\1\ NECSYS-FLOREY\FOpt\RMP2-FC\D95\C3H6S2\CSMAS\30-May-2002\0\\#MP2=D

IRECT/D95 DENSITY=CURRENT GEOM=CHECKPOINT GUESS=CHECK OPT=READFC\\opt

calc\\0,1\S,-0.6514128983,0.13925284,-1.6125303844\C,-0.6828809307,-0.

0042154487,0.0685558864\S,0.7914159669,-0.1324545846,1.143044387\C,-1.

9777271318,-0.0005562485,0.9003281532\C,2.2010526652,-0.0181754793,-0.

1076458454\H,-2.837931204,-0.2221744854,0.2498217642\H,-1.9295360174,-

0.7487795101,1.7120307677\H,-2.1257377413,0.9947314372,1.3593256323\H,

3.1229863436,-0.08259478,0.4898375371\H,2.1381824762,-0.8514455844,-0.

8214922393\H,2.1493194283,0.9391738956,-0.6451766693\\Version=NEC-SX-S

UPER-UX-G98RevA.9\HF=-911.9903815\MP2=-912.3805913\RMSD=5.058e-09\RMSF

=3.859e-06\Dipole=0.3331708,-0.2810258,0.0464298\PG=C01 [X(C3H6S2)]\\@

# MP2/D95//QCISD/MP2

QCISD=-912.4283568

### MeSCS(S)Me

# RHF/3-21G*

1\1\ NECSYS-FLOREY\FOpt\RHF\3-21G*\C3H6S3\CSMAS\28-Sep-2001\0\\#RHF/3-

21G* OPT\\freq calc\\0,1\S,0.,0.,-1.657592372\C,0.,0.,-0.0269335603\S,

1.4282776317,0.,0.9879633297\S,-1.4282776317,0.,0.9879633297\C,2.78721

18205,0.,-0.2016262016\C,-2.7872118205,0.,-0.2016262016\H,3.6945957159

,0.,0.3884525783\H,2.7532763284,0.8817384187,-0.8222844935\H,2.7532763

284,-0.8817384187,-0.8222844935\H,-3.6945957159,0.,0.3884525783\H,-2.7

532763284,-0.8817384187,-0.8222844935\H,-2.7532763284,0.8817384187,-0.

8222844935\\Version=NEC-SX-SUPER-UX-G98RevA.9\State=1-A1\HF=-1303.4369

634\RMSD=3.138e-09\RMSF=8.325e-05\Dipole=0.,0.,0.0984968\PG=C02V [C2(C

1S1),SGV(C2H2S2),X(H4)]\\@

**RHF/cc-pVDZ**

1\1\ NECSYS-FLOREY\FOpt\RHF\CC-pVDZ\C3H6S3\CSMAS\02-Jun-2002\0\\#RHF/C

C-PVDZ DENSITY=CURRENT GEOM=CHECKPOINT OPT\\opt calc\\0,1\S,0.,0.,-1.6

711144438\C,0.,0.,-0.0343749896\S,1.4315275351,0.,0.9877571521\S,-1.43

15275351,0.,0.9877571521\C,2.8059994299,0.,-0.1902450775\C,-2.80599942

99,0.,-0.1902450775\H,3.7016253909,0.,0.430081896\H,2.7780725605,0.891

452188,-0.8103426724\H,2.7780725605,-0.891452188,-0.8103426724\H,-3.70

16253909,0.,0.430081896\H,-2.7780725605,-0.891452188,-0.8103426724\H,-

2.7780725605,0.891452188,-0.8103426724\\Version=NEC-SX-SUPER-UX-G98Rev

A.9\State=1-A1\HF=-1309.6787177\RMSD=3.625e-09\RMSF=3.707e-05\Dipole=0

.,0.,0.1306129\PG=C02V [C2(C1S1),SGV(C2H2S2),X(H4)]\\@

**B3LYP/6-31G(d)**

1\1\ NECSYS-FLOREY\FOpt\RB3LYP\6-31G(d)\C3H6S3\CSMAS\27-May-2002\0\\#B

3LYP/6-31G* GEOM=CHECKPOINT DENSITY=CURRENT OPT\\opt calc\\0,1\S,0.,0.

,-1.6837934004\C,0.,0.,-0.0342515159\S,1.4371834034,0.,1.0026451308\S,

-1.4371834034,0.,1.0026451308\C,2.8020271872,0.,-0.2016152001\C,-2.802

0271872,0.,-0.2016152001\H,3.7166382805,0.,0.3976654005\H,2.7615935634

,0.8924139883,-0.8285972709\H,2.7615935634,-0.8924139883,-0.8285972709

\H,-3.7166382805,0.,0.3976654005\H,-2.7615935634,-0.8924139883,-0.8285

972709\H,-2.7615935634,0.8924139883,-0.8285972709\\Version=NEC-SX-SUPE

R-UX-G98RevA.9\State=1-A1\HF=-1312.4974653\RMSD=3.638e-09\RMSF=5.937e-

06\Dipole=0.,0.,0.1146911\PG=C02V [C2(C1S1),SGV(C2H2S2),X(H4)]\\@

# RHF/D95

1\1\ NECSYS-FLOREY\FOpt\RHF\D95\C3H6S3\CSMAS\26-May-2002\0\\#RHF/D95 O

PT GEOM=CHECKPOINT\\opt calc\\0,1\S,0.,0.,-1.6909496501\C,0.,0.,-0.024

9792034\S,1.4632552105,0.,1.009671215\S,-1.4632552105,0.,1.009671215\C

,2.8660894459,0.,-0.2145235662\C,-2.8660894459,0.,-0.2145235662\H,3.75

94100612,0.,0.3898605011\H,2.8175880288,0.8828203627,-0.8274618667\H,2

.8175880288,-0.8828203627,-0.8274618667\H,-3.7594100612,0.,0.389860501

1\H,-2.8175880288,-0.8828203627,-0.8274618667\H,-2.8175880288,0.882820

3627,-0.8274618667\\Version=NEC-SX-SUPER-UX-G98RevA.9\State=1-A1\HF=-1

309.4581157\RMSD=4.364e-09\RMSF=2.224e-05\Dipole=0.,0.,-0.076803\PG=C0

2V [C2(C1S1),SGV(C2H2S2),X(H4)]\\@

# MP2/D95

1\1\ NECSYS-FLOREY\FOpt\RMP2-FC\D95\C3H6S3\CSMAS\30-May-2002\0\\#MP2=D

IRECT/D95 OPT GUESS=CHECK DENSITY=CURRENT GEOM=CHECKPOINT\\opt calc\\0

,1\S,0.,0.,-1.7134675972\C,0.,0.,-0.0248512239\S,1.4940456087,0.,1.044

7889387\S,-1.4940456087,0.,1.0447889387\C,2.8690583544,0.,-0.252110469

3\C,-2.8690583544,0.,-0.2521104693\H,3.8022022458,0.,0.3323488262\H,2.

7989480169,0.9009065206,-0.8770072901\H,2.7989480169,-0.9009065206,-0.

8770072901\H,-3.8022022458,0.,0.3323488262\H,-2.7989480169,-0.90090652

06,-0.8770072901\H,-2.7989480169,0.9009065206,-0.8770072901\\Version=N

EC-SX-SUPER-UX-G98RevA.9\State=1-A1\HF=-1309.4529921\MP2=-1309.9094347

\RMSD=4.937e-09\RMSF=2.778e-05\Dipole=0.,0.,0.240984\PG=C02V [C2(C1S1)

,SGV(C2H2S2),X(H4)]\\@

**QCISD/D95//MP2/D95**

QCISD=-1309.9604757

**lactamCS(S)CH3**

# RHF/3-21G*

1\1\ NECSYS-FLOREY\FOpt\RHF\3-21G*\C6H9N1O1S2\CSMAS\01-Oct-2001\0\\#RH

F/3-21G* OPT\\freq calc\\0,1\S,0.6469329233,0.3013266653,-2.0433084265

\C,0.5674474782,0.0643579652,-0.4273813714\S,2.0165923421,-0.143234762

6,0.5799246651\N,-0.5807604514,-0.0057539687,0.3246049562\C,3.37451329

24,-0.0122791051,-0.600256085\C,-0.5829210461,0.016953822,1.814410992\

C,-1.8912792873,-0.1869238232,-0.1835846879\H,4.2780616705,-0.12069397

02,-0.0135496483\H,3.3179860307,-0.7945947184,-1.3399773826\H,3.365202

8938,0.9482282587,-1.0902730802\C,-2.0452590913,0.3591220473,2.1564006

812\C,-2.8238077278,-0.2971371507,1.0138599167\H,0.1058802997,0.761269

8211,2.1775455382\H,-0.3035916125,-0.9548131589,2.1998019912\H,-2.1803

344675,1.4321243823,2.1283475463\H,-2.3244521532,-0.0094583813,3.13173

88838\H,-2.9925710332,-1.3508579022,1.211212156\H,-3.7689480143,0.1700

299329,0.7856577892\O,-2.2050595511,-0.2793736822,-1.3361618723\\Versi

on=NEC-SX-SUPER-UX-G98RevA.9\HF=-1151.0865784\RMSD=9.573e-09\RMSF=3.82

4e-05\Dipole=0.208272,-0.0508069,2.29969\PG=C01 [X(C6H9N1O1S2)]\\@

# RHF/cc-pVDZ

1\1\ NECSYS-FLOREY\FOpt\RHF\CC-pVDZ\C6H9N1O1S2\CSMAS\01-Jun-2002\0\\#R

HF/CC-PVDZ DENSITY=CURRENT GEOM=CHECKPOINT OPT\\opt calc\\0,1\S,0.6332

211905,0.4152907193,-2.0311750291\C,0.5647754283,0.0902184877,-0.42744

50613\S,2.0142745771,-0.2069337864,0.5600129954\N,-0.5829949759,0.0201

788712,0.3289954507\C,3.3804822356,-0.0309377167,-0.6096060072\C,-0.59

04348194,0.0416697136,1.8016167791\C,-1.880717503,-0.2287912006,-0.176

6413454\H,4.2751162867,-0.193489815,-0.0089511236\H,3.3104647774,-0.77

69315064,-1.3951482789\H,3.3886461991,0.9661713627,-1.0393486035\C,-2.

0433538068,0.3583322214,2.1471534643\C,-2.8167438385,-0.2969555339,1.0

127516156\H,0.0991029354,0.7931028251,2.1737915309\H,-0.2870108687,-0.

9296552799,2.198464079\H,-2.1960728895,1.4389422976,2.1328366198\H,-2.

3147914187,-0.0081662567,3.1356150683\H,-3.0111555871,-1.3546246148,1.

2099759783\H,-3.7645363249,0.1735249327,0.7623261278\O,-2.1828470923,-

0.3981315999,-1.3026142106\\Version=NEC-SX-SUPER-UX-G98RevA.9\HF=-1156

.8482627\RMSD=8.916e-09\RMSF=7.442e-06\Dipole=0.269984,-0.0131021,2.17

02379\PG=C01 [X(C6H9N1O1S2)]\\@

**B3LYP/6-31G(d)**

1\1\ NECSYS-FLOREY\FOpt\RB3LYP\6-31G(d)\C6H9N1O1S2\CSMAS\27-May-2002\0

\\#B3LYP/6-31G* GEOM=CHECKPOINT DENSITY=CURRENT OPT\\opt calc\\0,1\S,0

.6483667163,0.3750201017,-2.0524564057\C,0.5748538088,0.0921564353,-0.

4310469236\S,2.0274196297,-0.1915249399,0.5948892621\N,-0.5855397228,0

.0384686615,0.3261730941\C,3.3831034594,-0.0361404421,-0.6037243982\C,

-0.5927413388,0.0560534941,1.80599036\C,-1.8963828729,-0.213983032,-0.

1870509564\H,4.2990446634,-0.1585137519,-0.0184692049\H,3.3131998634,-

0.811581752,-1.3680445991\H,3.3629261079,0.9463595791,-1.0784553372\C,

-2.0583816203,0.3464539948,2.163398677\C,-2.8354956657,-0.2952152848,1

.0131974586\H,0.092790995,0.821275858,2.1765732461\H,-0.2660046837,-0.

9162577544,2.1975619285\H,-2.22724985,1.4284042883,2.1788966649\H,-2.3

198683088,-0.0507892803,3.1473661799\H,-3.0442177424,-1.3566977142,1.2

019578119\H,-3.7852809707,0.1873809992,0.771696051\O,-2.1986097717,-0.

3738418354,-1.341975676\\Version=NEC-SX-SUPER-UX-G98RevA.9\HF=-1160.41

95821\RMSD=5.322e-09\RMSF=2.528e-05\Dipole=0.2065781,-0.0103259,1.9984

313\PG=C01 [X(C6H9N1O1S2)]\\@

# RHF/D95

1\1\ NECSYS-FLOREY\FOpt\RHF\D95\C6H9N1O1S2\CSMAS\26-May-2002\0\\#RHF/D

95 GEOM=CHECKPOINT OPT\\opt calc\\0,1\S,0.6353892251,0.3810655032,-2.0

703413069\C,0.5542973532,0.0751667158,-0.4267091199\S,2.0453513567,-0.

1705424541,0.589990451\N,-0.5922825982,-0.0104339179,0.3304973091\C,3.

4421629853,-0.0041592758,-0.6245674862\C,-0.5986754022,0.0420009948,1.

8223601518\C,-1.9016250972,-0.2380643676,-0.1668456466\H,4.3342607327,

-0.1431556165,-0.033661527\H,3.3580928506,-0.7613536986,-1.3834180438\

H,3.4232418416,0.97377067,-1.071883973\C,-2.0611295575,0.3558390096,2.

1690488273\C,-2.8518093675,-0.2675139877,1.0149404869\H,0.078439509,0.

8031033149,2.1700386375\H,-0.2835953874,-0.9112697602,2.2251834697\H,-

2.2132823663,1.426641426,2.1974157392\H,-2.3354944854,-0.0453409544,3.

1334851234\H,-3.1130092014,-1.3005208731,1.2125875613\H,-3.761236724,0

.2555130198,0.7640400493\O,-2.2165766719,-0.421541678,-1.3213772232\\V

ersion=NEC-SX-SUPER-UX-G98RevA.9\HF=-1156.5927691\RMSD=4.000e-09\RMSF=

6.539e-06\Dipole=0.3382395,0.0797064,2.4580161\PG=C01 [X(C6H9N1O1S2)]\

\@

**MP2/D95**

1\1\ NECSYS-FLOREY\FOpt\RMP2-FC\D95\C6H9N1O1S2\CSMAS\30-May-2002\0\\#M

P2=DIRECT/D95 OPT GUESS=CHECK DENSITY=CURRENT GEOM=CHECKPOINT\\opt cal

c\\0,1\S,0.6552088907,0.6036261325,-2.043330427\C,0.579598872,0.123664

1411,-0.4280102407\S,2.0649340531,-0.3922569669,0.5792136865\N,-0.6057

881561,0.0386866512,0.3446482317\C,3.4544772441,-0.05535045,-0.6501637

518\C,-0.6091248967,0.1311137241,1.8516456144\C,-1.9158621993,-0.27451

32655,-0.1803122871\H,4.3793012614,-0.270777258,-0.0923867836\H,3.3567

983942,-0.7155495546,-1.5220007076\H,3.4264982043,0.9961970852,-0.9685

364435\C,-2.1164126632,0.3847175426,2.1876385723\C,-2.8883973938,-0.31

06200816,1.0226442498\H,0.0447958461,0.9572454383,2.1709010735\H,-0.24

42913061,-0.8137780897,2.2964519691\H,-2.3239810101,1.4690689691,2.195

1295619\H,-2.377157061,-0.0332568404,3.1742937027\H,-3.1214742644,-1.3

664511169,1.2567025284\H,-3.8277613852,0.1960440399,0.7474273663\O,-2.

2025215581,-0.508190693,-1.3831631228\\Version=NEC-SX-SUPER-UX-G98RevA

.9\HF=-1156.5800209\MP2=-1157.4635583\RMSD=7.556e-09\RMSF=1.098e-05\Di

pole=-0.3306116,-1.8595919,0.2991007\PG=C01 [X(C6H9N1O1S2)]\\@

**QCISD/D95//MP2/D95**

QCISD=-1157.5314807

### CH3OCS(S)CH3

# RHF/3-21G*

1\1\ NECSYS-FLOREY\FOpt\RHF\3-21G*\C3H6O1S2\CSMAS\01-Oct-2001\0\\#RHF/

3-21G* OPT\\freq calc\\0,1\S,-0.0910512677,0.,-1.6135611006\C,-0.25836

35553,0.,0.0100261677\S,1.002480039,0.,1.2163024677\O,-1.4181793291,0.

,0.6768343655\C,2.5091860222,0.,0.2218534835\C,-2.69915178,0.,-0.01524

30209\H,3.330945551,0.,0.9263923437\H,-3.4311594646,0.,0.7730130054\H,

2.5629537166,0.8811490731,-0.3985426859\H,2.5629537166,-0.8811490731,-

0.3985426859\H,-2.7865716746,-0.8816427668,-0.6303382789\H,-2.78657167

46,0.8816427668,-0.6303382789\\Version=NEC-SX-SUPER-UX-G98RevA.9\State

=1-A'\HF=-982.2142471\RMSD=7.188e-09\RMSF=1.244e-05\Dipole=-0.1856908,

0.,0.2350698\PG=CS [SG(C3H2O1S2),X(H4)]\\@

**B3LYP/6-31G(d)**

1\1\ NECSYS-FLOREY\FOpt\RB3LYP\6-31G(d)\C3H6O1S2\CSMAS\27-May-2002\0\\

#B3LYP/6-31G* GEOM=CHECKPOINT DENSITY=CURRENT OPT\\opt calc\\0,1\S,-0.

1064930532,0.,-1.6222329928\C,-0.2778940385,0.,0.0191675729\S,1.013888

9484,0.,1.23426445\O,-1.4292907253,0.,0.6987637965\C,2.5118384948,0.,0

.2008970473\C,-2.668852714,0.,-0.0294760347\H,3.350673231,0.,0.9025724

85\H,-3.4421735879,0.,0.739006301\H,2.5491004046,0.8922017372,-0.42653

21321\H,2.5491004046,-0.8922017372,-0.4265321321\H,-2.7406297133,-0.89

16171608,-0.6573298613\H,-2.7406297133,0.8916171608,-0.6573298613\\Ver

sion=NEC-SX-SUPER-UX-G98RevA.9\State=1-A'\HF=-989.5242356\RMSD=3.269e-

09\RMSF=2.659e-05\Dipole=-0.1428343,0.,0.2896407\PG=CS [SG(C3H2O1S2),X

(H4)]\\@

# RHF/cc-pVDZ

1\1\ NECSYS-FLOREY\FOpt\RHF\CC-pVDZ\C3H6O1S2\CSMAS\02-Jun-2002\0\\#RHF

/CC-PVDZ DENSITY=CURRENT GEOM=CHECKPOINT OPT\\opt calc\\0,1\S,0.008075

3135,-1.6138807763,0.1105894858\C,0.0206488924,0.0197414891,0.28278163

91\S,-0.0732617349,1.216762642,-1.003301924\O,0.1029096257,0.676546353

,1.4093226932\C,-0.1829812539,0.213694164,-2.5058844755\C,0.1935398325

,-0.0138372813,2.650481683\H,-0.2424900666,0.9345498966,-3.3208434224\

H,0.2483529293,0.7678683088,3.4011339234\H,-1.0751292358,-0.4058109604

,-2.4896865768\H,0.702056315,-0.4058109604,-2.6194577788\H,1.086329861

7,-0.633433595,2.6719667458\H,-0.686658894,-0.633433595,2.8014314952\\

Version=NEC-SX-SUPER-UX-G98RevA.9\State=1-A'\HF=-987.0146801\RMSD=2.97

7e-09\RMSF=2.896e-05\Dipole=0.0127837,0.3638317,0.1750697\PG=CS [SG(C3

H2O1S2),X(H4)]\\@

# RHF/D95

1\1\ NECSYS-FLOREY\FOpt\RHF\D95\C3H6O1S2\CSMAS\26-May-2002\0\\#RHF/D95

OPT GEOM=CHECKPOINT\\opt calc\\0,1\S,-0.0958736075,0.,-1.643135328\C,

-0.2826466304,0.,0.0239079229\S,1.0195306303,0.,1.250221863\O,-1.44690

51387,0.,0.6657577317\C,2.5667551083,0.,0.2164406009\C,-2.7320723905,0

.,-0.0202760073\H,3.3783425124,0.,0.9268504913\H,-3.4570961098,0.,0.77

32027918\H,2.5984780027,0.8821287945,-0.398423008\H,2.5984780027,-0.88

21287945,-0.398423008\H,-2.8168450936,-0.8847911025,-0.6315443902\H,-2

.8168450936,0.8847911025,-0.6315443902\\Version=NEC-SX-SUPER-UX-G98Rev

A.9\State=1-A'\HF=-986.8286246\RMSD=4.118e-09\RMSF=2.539e-05\Dipole=-0

.2091455,0.,0.1736387\PG=CS [SG(C3H2O1S2),X(H4)]\\@

# MP2/D95

1\1\ NECSYS-FLOREY\FOpt\RMP2-FC\D95\C3H6O1S2\CSMAS\27-May-2002\0\\#MP2

=DIRECT/D95 OPT=READFC GUESS=CHECK DENSITY=CURRENT GEOM=CHECKPOINT\\op

t calc\\0,1\S,0.0071787636,-1.6589193911,0.0983114487\C,0.019969849,0.

020023018,0.2734823022\S,-0.0760863491,1.2889696772,-1.0419843398\O,0.

1078644502,0.7221358399,1.4771778283\C,-0.1875204598,0.1795311538,-2.5

680478142\C,0.2009110416,-0.061747805,2.7514286269\H,-0.2497312736,0.8

739843078,-3.4200100188\H,0.2569635229,0.7187109894,3.5190539422\H,-1.

0861890826,-0.4497649458,-2.5141900358\H,0.7094393085,-0.4497649458,-2

.6453079455\H,1.1049122016,-0.6889474514,2.7345594027\H,-0.6959514944,

-0.6889474514,2.8660595977\\Version=NEC-SX-SUPER-UX-G98RevA.9\State=1-

A'\HF=-986.8205913\MP2=-987.3325244\RMSD=8.106e-10\RMSF=5.814e-05\Dipo

le=-0.2096832,0.,-0.1461504\PG=CS [SG(C3H2O1S2),X(H4)]\\@

# MP2/D95//QCISD/MP2

QCISD=-987.378432

### H2NCS(S)CH3

**RHF/3-21G***

1\1\ NECSYS-FLOREY\FOpt\RHF\3-21G*\C2H5N1S2\CSMAS\27-Sep-2001\0\\#RHF/

3-21G* OPT\\freq calc\\0,1\S,-0.6747478944,0.,-1.5613862302\C,-0.68073

74069,0.,0.0946054176\S,0.7576951144,0.,1.1161750963\N,-1.8060633528,0

.,0.8164472637\C,2.1174984007,0.,-0.0738385146\H,-1.8048831231,0.,1.81

54385407\H,-2.683942377,0.,0.3394181479\H,3.0249622186,0.,0.5159539051

\H,2.0792926344,-0.8812279334,-0.6935823577\H,2.0792926344,0.881227933

4,-0.6935823577\\Version=NEC-SX-SUPER-UX-G98RevA.9\State=1-A'\HF=-923.

6954964\RMSD=2.111e-09\RMSF=4.718e-05\Dipole=-0.049244,0.,1.2742416\PG

=CS [SG(C2H3N1S2),X(H2)]\\@

# RHF/cc-pVDZ

1\1\ NECSYS-FLOREY\FOpt\RHF\CC-pVDZ\C2H5N1S2\CSMAS\06-Jun-2002\0\\#RHF

/CC-PVDZ DENSITY=CURRENT OPT\\opt calc\\0,1\S,-0.6545669021,0.40200866

82,-1.5301693464\C,-0.682911949,0.0191382375,0.0842972336\S,0.73540588

26,-0.3024252987,1.0924532184\N,-1.8129006029,-0.0821014088,0.78128763

63\C,2.1280837211,-0.1107119867,-0.0483252271\H,-1.8196544034,-0.31225

40451,1.7528299011\H,-2.6785184985,0.0806037076,0.3104266592\H,3.01277

33343,-0.3047754595,0.5570158222\H,2.0563768699,-0.8320491459,-0.85636

38868\H,2.1548725983,0.8992933864,-0.4452959417\\Version=NEC-SX-SUPER-

UX-G98RevA.9\HF=-928.1676363\RMSD=3.390e-09\RMSF=2.986e-05\Dipole=-0.0

781533,-0.2857446,1.2229659\PG=C01 [X(C2H5N1S2)]\\@

**B3LYP/6-31G(d)**

1\1\ NECSYS-FLOREY\FOpt\RB3LYP\6-31G(d)\C2H5N1S2\CSMAS\27-May-2002\0\\  #B3LYP/6-31G* GEOM=CHECKPOINT DENSITY=CURRENT OPT\\opt calc\\0,1\S,-0.  679668565,0.,-1.5777176753\C,-0.6825867581,0.,0.084053734\S,0.76532648  6,0.,1.1349075278\N,-1.8161961716,0.,0.8190311761\C,2.1252416991,0.,-0  .073591904\H,-1.8112135511,0.,1.8306967151\H,-2.7039224525,0.,0.336332  2476\H,3.0431664672,0.,0.5207387165\H,2.0794431781,-0.8923767202,-0.69  93972656\H,2.0794431781,0.8923767202,-0.6993972656\\Version=NEC-SX-SUP  ER-UX-G98RevA.9\State=1-A'\HF=-930.3575602\RMSD=4.358e-09\RMSF=4.594e-  05\Dipole=-0.1342181,0.,1.1192103\PG=CS [SG(C2H3N1S2),X(H2)]\\@

**RHF/D95**

1\1\ NECSYS-FLOREY\FOpt\RHF\D95\C2H5N1S2\CSMAS\26-May-2002\0\\#RHF/D95

GEOM=CHECKPOINT OPT\\opt calc\\0,1\S,-0.6986689143,0.,-1.5948678455\C

,-0.7006821607,0.,0.1002806195\S,0.7718075943,0.,1.1416910519\N,-1.828

4177086,0.,0.8298417115\C,2.1747774544,0.,-0.0803031907\H,-1.821004682

7,0.,1.8256220281\H,-2.7057175571,0.,0.3592902416\H,3.0693369967,0.,0.

5220107451\H,2.1207592803,-0.8823356169,-0.6924254358\H,2.1207592803,0

.8823356169,-0.6924254358\\Version=NEC-SX-SUPER-UX-G98RevA.9\State=1-A

'\HF=-928.0094498\RMSD=7.622e-09\RMSF=6.153e-05\Dipole=-0.0318631,0.,1

.2183351\PG=CS [SG(C2H3N1S2),X(H2)]\\@

**MP2/D95**

1\1\ NECSYS-FLOREY\FOpt\RMP2-FC\D95\C2H5N1S2\CSMAS\30-May-2002\0\\#MP2

=DIRECT/D95 GUESS=CHECK DENSITY=CURRENT GEOM=CHECKPOINT OPT=READFC\\op

t calc\\0,1\S,-0.6784461022,0.,-1.6216212952\C,-0.7068561687,0.,0.0779

813386\S,0.7802470359,0.,1.1836337894\N,-1.8716243046,0.,0.8301802172\

C,2.1716071137,0.,-0.0899323559\H,-1.8599230641,0.,1.8476150001\H,-2.7

663614453,0.,0.3467041618\H,3.0986163345,0.,0.5040960504\H,2.105858849

1,-0.9003053065,-0.7150852683\H,2.1058588491,0.9003053065,-0.715085268

3\\Version=NEC-SX-SUPER-UX-G98RevA.9\State=1-A'\HF=-928.0043557\MP2=-9

28.406618\RMSD=6.743e-09\RMSF=7.012e-05\Dipole=0.8751404,0.3269092,0.\

PG=CS [SG(C2H3N1S2),X(H2)]\\@

**MP2/D95//QCSID/D95**

QCISD=-928.4472651

### CH32NCS(S)CH3

**RHF/cc-pVDZ**

1\1\ NECSYS-FLOREY\FOpt\RHF\CC-pVDZ\C4H9N1S2\CSMAS\01-Jun-2002\0\\#RHF

/CC-PVDZ DENSITY=CURRENT GEOM=CHECKPOINT OPT\\opt calc\\0,1\S,0.077998

5727,1.8338797284,-0.0623940653\C,0.1061065577,0.1625486851,-0.0848787

262\S,-1.0515712715,-0.8223604097,0.8411924011\N,0.9847877595,-0.55418

12926,-0.7877696952\C,-2.0940627273,0.3984306863,1.6751215076\C,0.9809

252051,-2.014222264,-0.784679889\C,1.9902158198,0.1377929841,-1.592050

3627\H,-2.8059754268,-0.1990977724,2.2446079222\H,-1.5008457634,1.0175

795466,2.3405157663\H,-2.6129551827,1.0175795466,0.9502722091\H,1.7824

471844,-2.3652560998,-1.4258482212\H,1.1451121222,-2.4077610713,0.2186

632716\H,0.0381233706,-2.4077610713,-1.1651789594\H,2.6074520735,-0.60

71068294,-2.0858014383\H,1.5153806363,0.7697415749,-2.3401609989\H,2.6

158007185,0.7697415749,-0.9645302355\\Version=NEC-SX-SUPER-UX-G98RevA.

9\State=1-A'\HF=-1006.2211911\RMSD=7.789e-09\RMSF=3.492e-05\Dipole=0.2

927874,-1.3927429,-0.2342119\PG=CS [SG(C4H3N1S2),X(H6)]\\@

# RHF/3-21G*

1\1\ NECSYS-FLOREY\FOpt\RHF\3-21G*\C4H9N1S2\CSMAS\27-Sep-2001\0\\#RHF/

3-21G* OPT\\opt calc\\0,1\S,-0.0904152233,0.,-1.8304396488\C,-0.130555

371,0.,-0.1632929643\S,1.3442745376,0.,0.8231028722\N,-1.2591555733,0.

,0.5521025983\C,2.6731438842,0.,-0.399637754\C,-1.2592402324,0.,2.0275

555266\C,-2.5582675948,0.,-0.1497647281\H,3.5916482871,0.,0.1738829814

\H,2.6234086412,-0.8803566023,-1.0194929399\H,2.6234086412,0.880356602

3,-1.0194929399\H,-2.280829737,0.,2.3700314299\H,-0.7626225376,-0.8814

23774,2.4126911155\H,-0.7626225376,0.881423774,2.4126911155\H,-3.34460

41225,0.,0.5882290624\H,-2.6429653832,0.8753532846,-0.7775150347\H,-2.

6429653832,-0.8753532846,-0.7775150347\\Version=NEC-SX-SUPER-UX-G98Rev

A.9\State=1-A'\HF=-1001.317448\RMSD=5.348e-09\RMSF=1.756e-05\Dipole=-0

.4289083,0.,1.4524791\PG=CS [SG(C4H3N1S2),X(H6)]\\@

**B3LYP/6-31G(d)**

1\1\ NECSYS-FLOREY\FOpt\RB3LYP\6-31G(d)\C3H6S2\CSMAS\27-May-2002\0\\#B

3LYP/6-31G* DENSITY=CURRENT OPT\\opt calc\\0,1\S,-0.6624431688,-0.0264

551853,-1.5693787484\C,-0.6499611765,-0.0159153581,0.0765636529\S,0.78

19361866,0.0048070926,1.0911467971\C,-1.9163896815,0.0034126662,0.9075

874076\C,2.1555467433,0.0381115917,-0.0992594274\H,-2.6268684986,-0.72

81211665,0.513482553\H,-1.7325103722,-0.2045540877,1.9671907131\H,-2.3

82559867,0.9922511057,0.8260717952\H,2.0972398315,0.9338915186,-0.7210

030751\H,3.0732778712,0.0463706432,0.4944609183\H,2.1243574375,-0.8471

219294,-0.7378414822\\Version=NEC-SX-SUPER-UX-G98RevA.9\HF=-914.307376

9\RMSD=4.697e-09\RMSF=8.391e-06\Dipole=0.3602839,0.0413371,0.6916164\P

G=C01 [X(C3H6S2)]\\@

## RHF/D95

## 1\1\ NECSYS-FLOREY\FOpt\RHF\D95\C4H9N1S2\CSMAS\26-May-2002\0\\#RHF/D95

## GEOM=CHECKPOINT OPT\\opt calc\\0,1\S,-0.1033148919,0.,-1.8676880139\C

## ,-0.1490563209,0.,-0.1559186539\S,1.3672346347,0.,0.847388013\N,-1.278

## 4264783,0.,0.5621369056\C,2.7328680017,0.,-0.4149525898\C,-1.282076258

## 4,0.,2.0390264505\C,-2.5790204259,0.,-0.1388838543\H,3.6413552844,0.,0

## .1676620561\H,2.6640815677,-0.8814122535,-1.0266500905\H,2.6640815677,

## 0.8814122535,-1.0266500905\H,-2.3027660626,0.,2.3819918223\H,-0.786598

## 3971,-0.8796994743,2.426834056\H,-0.7865983971,0.8796994743,2.42683405

## 6\H,-3.3670151379,0.,0.5969290491\H,-2.6682804704,0.8748317145,-0.7663

## 686493\H,-2.6682804704,-0.8748317145,-0.7663686493\\Version=NEC-SX-SUP

## ER-UX-G98RevA.9\State=1-A'\HF=-1006.0302621\RMSD=3.844e-09\RMSF=1.250e

## -05\Dipole=-0.4434379,0.,1.4306535\PG=CS [SG(C4H3N1S2),X(H6)]\\@

## MP2/D95

1\1\ NECSYS-FLOREY\FOpt\RMP2-FC\D95\C4H9N1S2\CSMAS\27-May-2002\0\\#MP2

=DIRECT/D95 GUESS=CHECK DENSITY=CURRENT GEOM=CHECKPOINT OPT=READFC\\op

t calc\\0,1\S,0.0714255544,1.8930869337,-0.0571360546\C,0.1105123241,0

.1769143214,-0.0884030686\S,-1.0880827236,-0.8905677826,0.8703993193\N

,1.0208874904,-0.5650584761,-0.8166472617\C,-2.1392932851,0.430432189,

1.7113031745\C,1.017994935,-2.0621215852,-0.8143333951\C,2.0426191925,

0.1605106698,-1.6339698408\H,-2.8761773232,-0.1381643961,2.3007651256\

H,-1.5111665651,1.0542412639,2.3604425647\H,-2.63466193,1.0542412639,0

.955965482\H,1.8328677109,-2.4063329048,-1.4661815442\H,1.1815660719,-

2.450887506,0.2054325693\H,0.0590359069,-2.450887506,-1.1978379208\H,2

.6713777885,-0.5882160317,-2.1369380822\H,1.5456240954,0.8033475812,-2

.3795173398\H,2.6608375202,0.8033475812,-0.9853934775\\Version=NEC-SX-

SUPER-UX-G98RevA.9\State=1-A'\HF=-1006.0234001\MP2=-1006.6091241\RMSD=

7.683e-10\RMSF=3.374e-05\Dipole=-0.6222253,0.,1.1746409\PG=CS [SG(C4H3

N1S2),X(H6)]\\@

## MP2/D95//QCISD/D95

QCISD=-1006.6735186
